# Supplementary material
Source: PubMed Central journal article supplement (PMC1360613)

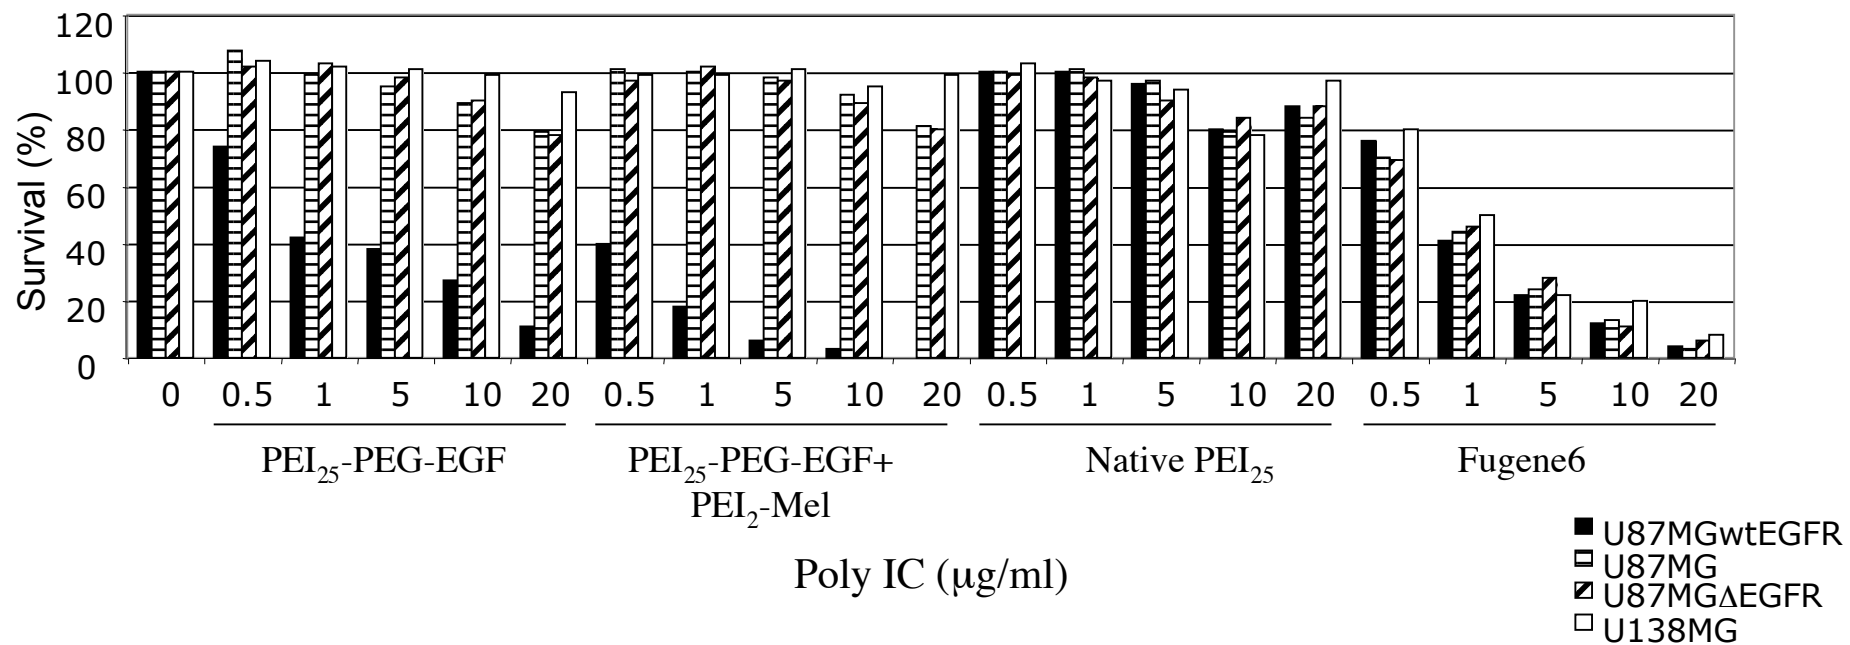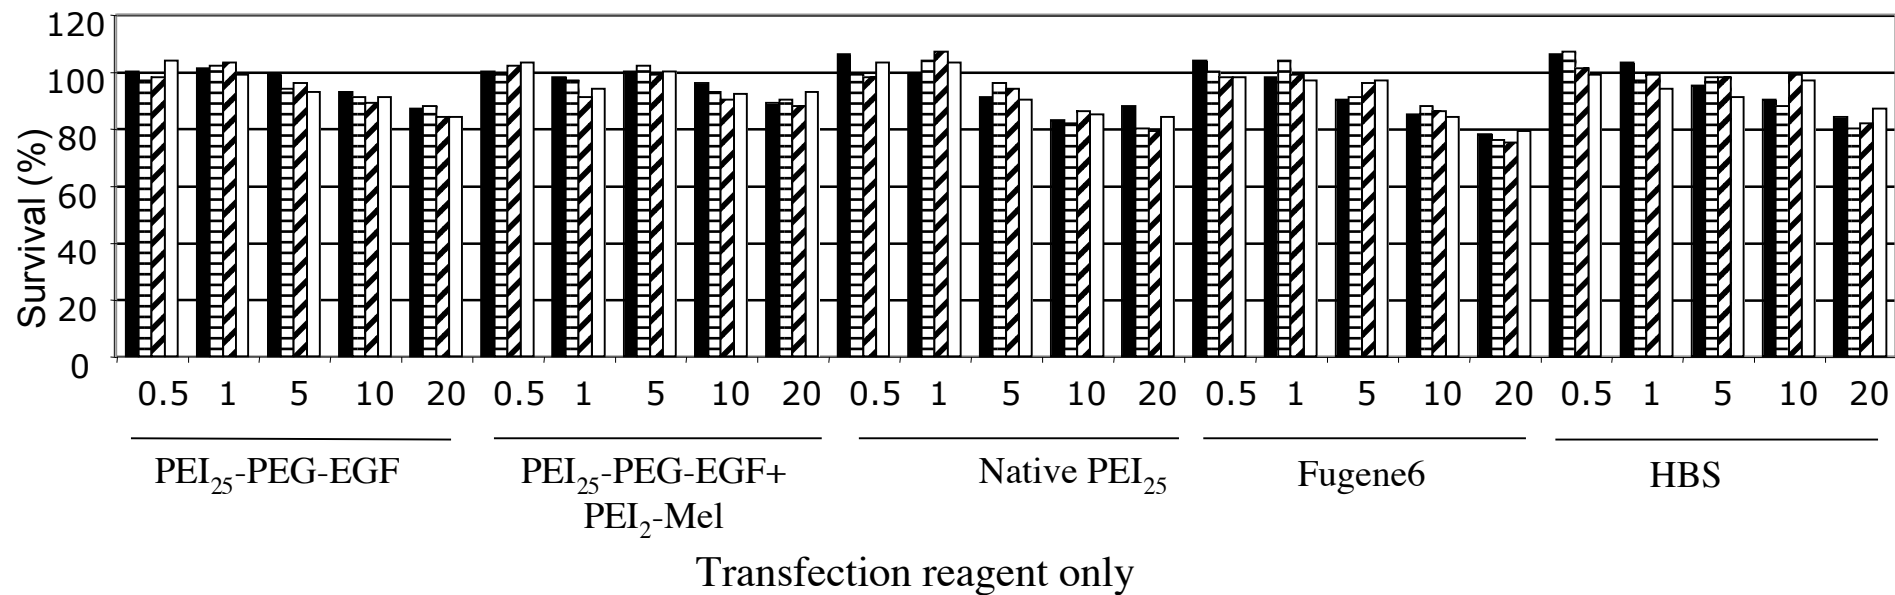

Supplement: pmed.0030006.sg001.pdf [file pmed.0030006.sg001.pdf]
